# Supplementary material
Source: HighWire-hosted journal article supplement (https://erj.ersjournals.com/content/58/4/2100673)

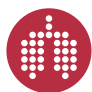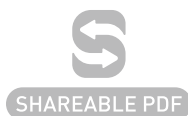

# A phase 2 multiple ascending dose study of the inhaled pan-JAK inhibitor nezulcitinib (TD-0903) in severe COVID-19

Dave Singh<sup>1</sup>, Maxim Bogus<sup>2</sup>, Valentyn Moskalenko<sup>3,4,5</sup>, Robert Lord<sup>6</sup>, Edmund J. Moran<sup>7</sup>, Glenn D. Crater<sup>7</sup>, David L. Bourdet<sup>7</sup>, Nathan D. Pfeifer<sup>7</sup>, Jacky Woo<sup>7</sup>, Elad Kaufman<sup>7</sup>, David A. Lombardi<sup>7</sup>, Emily Y. Weng<sup>7</sup>, Tuan Nguyen<sup>7</sup>, Ashley Woodcock<sup>6</sup>, Brett Haumann<sup>8</sup> and Rajeev Saggar<sup>7</sup>

<sup>1</sup>Medicines Evaluation Unit, University of Manchester, Manchester University NHS Foundations Trust, Manchester, UK. <sup>2</sup>Arensia Exploratory Medicine SRL, Timofei Moşneaga Republican Clinical Hospital, Chişinău, Moldova. <sup>3</sup>Arensia Exploratory Medicine, LLC, Kyiv City Clinical Hospital #12, Kyiv, Ukraine. <sup>4</sup>Oleksandrivska Kyiv City Clinical Hospital, Kyiv, Ukraine. <sup>5</sup>Brovary Multidisciplinary Clinical Hospital, Brovary, Ukraine. <sup>6</sup>University of Manchester, Manchester University NHS Foundations Trust, Manchester, UK. <sup>7</sup>Theravance Biopharma US, Inc., South San Francisco, CA, USA. <sup>8</sup>Theravance Biopharma UK Limited, London, UK.

Rajeev Saggar ([rsaggar@theravance.com](mailto:rsaggar@theravance.com))

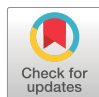

Shareable abstract (@ERSpublications)

The inhaled lung-selective pan-JAK inhibitor nezulcitinib appears generally well tolerated in hospitalised patients with severe #COVID-19, with trends for improved oxygenation and clinical status, shortened hospitalisation, and fewer deaths *versus* placebo <https://bit.ly/35Xs1Rf>

**Cite this article as:** Singh D, Bogus M, Moskalenko V, *et al.* A phase 2 multiple ascending dose study of the inhaled pan-JAK inhibitor nezulcitinib (TD-0903) in severe COVID-19. *Eur Respir J* 2021; 58: 2100673 [DOI: 10.1183/13993003.00673-2021].

This single-page version can be shared freely online.

Copyright ©The authors 2021.

This version is distributed under the terms of the Creative Commons Attribution Non-Commercial Licence 4.0. For commercial reproduction rights and permissions contact [permissions@ersnet.org](mailto:permissions@ersnet.org)

Received: 5 March 2021  
Accepted: 19 June 2021

*To the Editor:*

Severe coronavirus disease 2019 (COVID-19) is characterised by pneumonia with excessive systemic inflammation, referred to as a “cytokine storm” [1–3]. Dexamethasone treatment decreases mortality in patients with COVID-19 receiving respiratory support and is standard of care for severe COVID-19 [4, 5]. However, pulmonary inflammation, which drives COVID-19 morbidity and mortality [3], can persist despite corticosteroid use [6, 7]. Janus kinase (JAK) inhibition blocks signalling by many cytokines in diverse cell types, offering broad immunomodulation [8]. The oral JAK-1/2 inhibitor baricitinib combined with the antiviral remdesivir shows clinical efficacy in patients with severe COVID-19 [9]. Direct delivery of JAK inhibition to the lung via inhalation could overcome corticosteroid-resistant pulmonary inflammation [10], offering the potential for improved responses while minimising risk of excessive systemic immunosuppression. The novel inhaled pan-JAK inhibitor nezulcitinib (TD-0903) was designed to target all JAK isoforms (JAK1, JAK2, JAK3, TYK2;  $-\log$  inhibition constant  $\geq 9.2$ ) and optimise delivery to the lungs while limiting systemic exposure (R. Sana and co-workers; unpublished results; abstract submitted to ERS International Congress, 2021). We report results from the completed part 1 of a 2-part phase 2 trial (NCT04402866) in hospitalised patients with severe COVID-19.

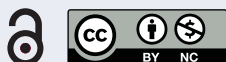

Supplement: inline-supplementary-material-1 [file inline-supplementary-material-1.pdf]
